# Supplementary material for: A live, impaired-fidelity coronavirus vaccine protects in an aged, immunocompromised mouse model of lethal disease
Source: Springer Nature journal article supplement (doi:10.1038/nm.2972), 2012-11-11
Supplement: 41591_2012_BFnm2972_MOESM2_ESM.pdf [file 41591_2012_BFnm2972_MOESM2_ESM.pdf]

**Supplementary Information** for “A live, impaired-fidelity coronavirus vaccine protects in an aged, immunocompromised mouse model” by R.L. Graham, M.M. Becker, L.D. Eckerle, M. Bolles, M.R. Denison, and R.S. Baric

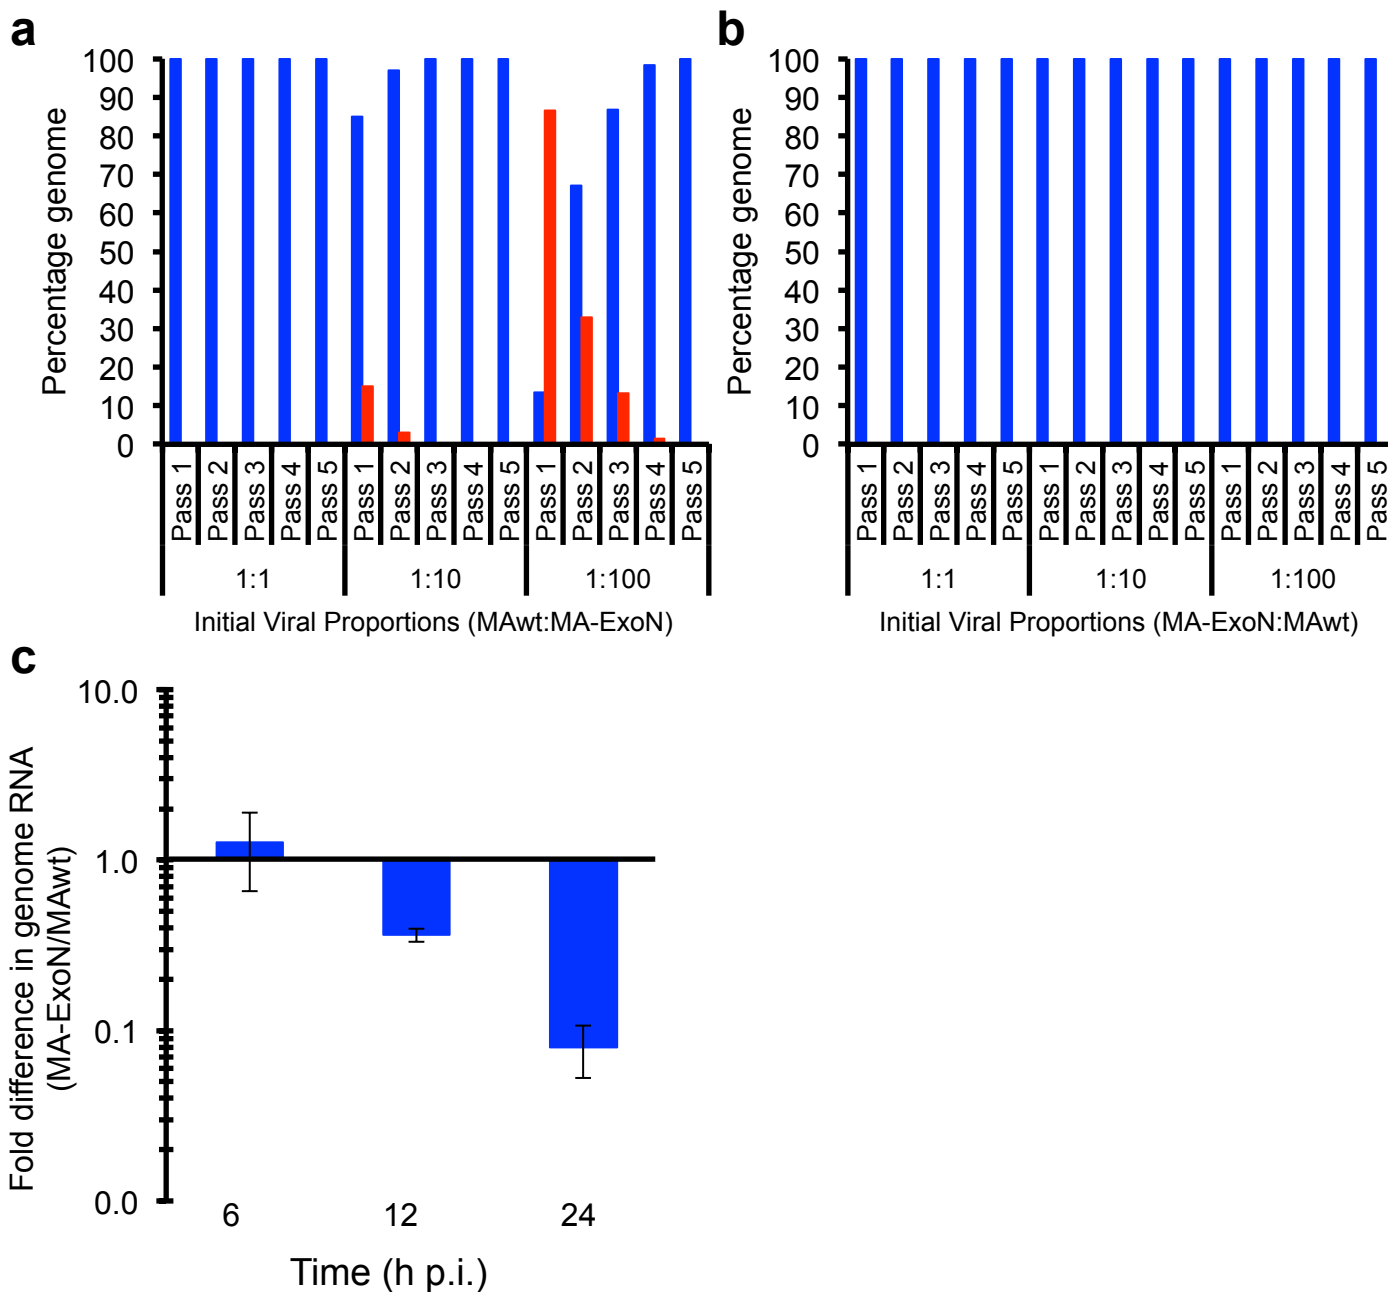

**Supplementary Figure 1. Replication advantage of MAwt vs. MA-ExoN.** Results from a competition assay using initial proportions of 1:1, 1:10, and 1:100 of MAwt and MA-ExoN favoring either MA-ExoN (a) or MAwt (b) are shown. Graphs show percentages of MAwt genomes vs. MA-ExoN genomes over five serial passages. Blue bars: MAwt; red bars: MA-ExoN. (c) Real-time RT-PCR was used to quantify viral genome RNA from MA-ExoN and MAwt infections. Results are expressed as GAPDH-normalized ratios of MA-ExoN/MAwt.

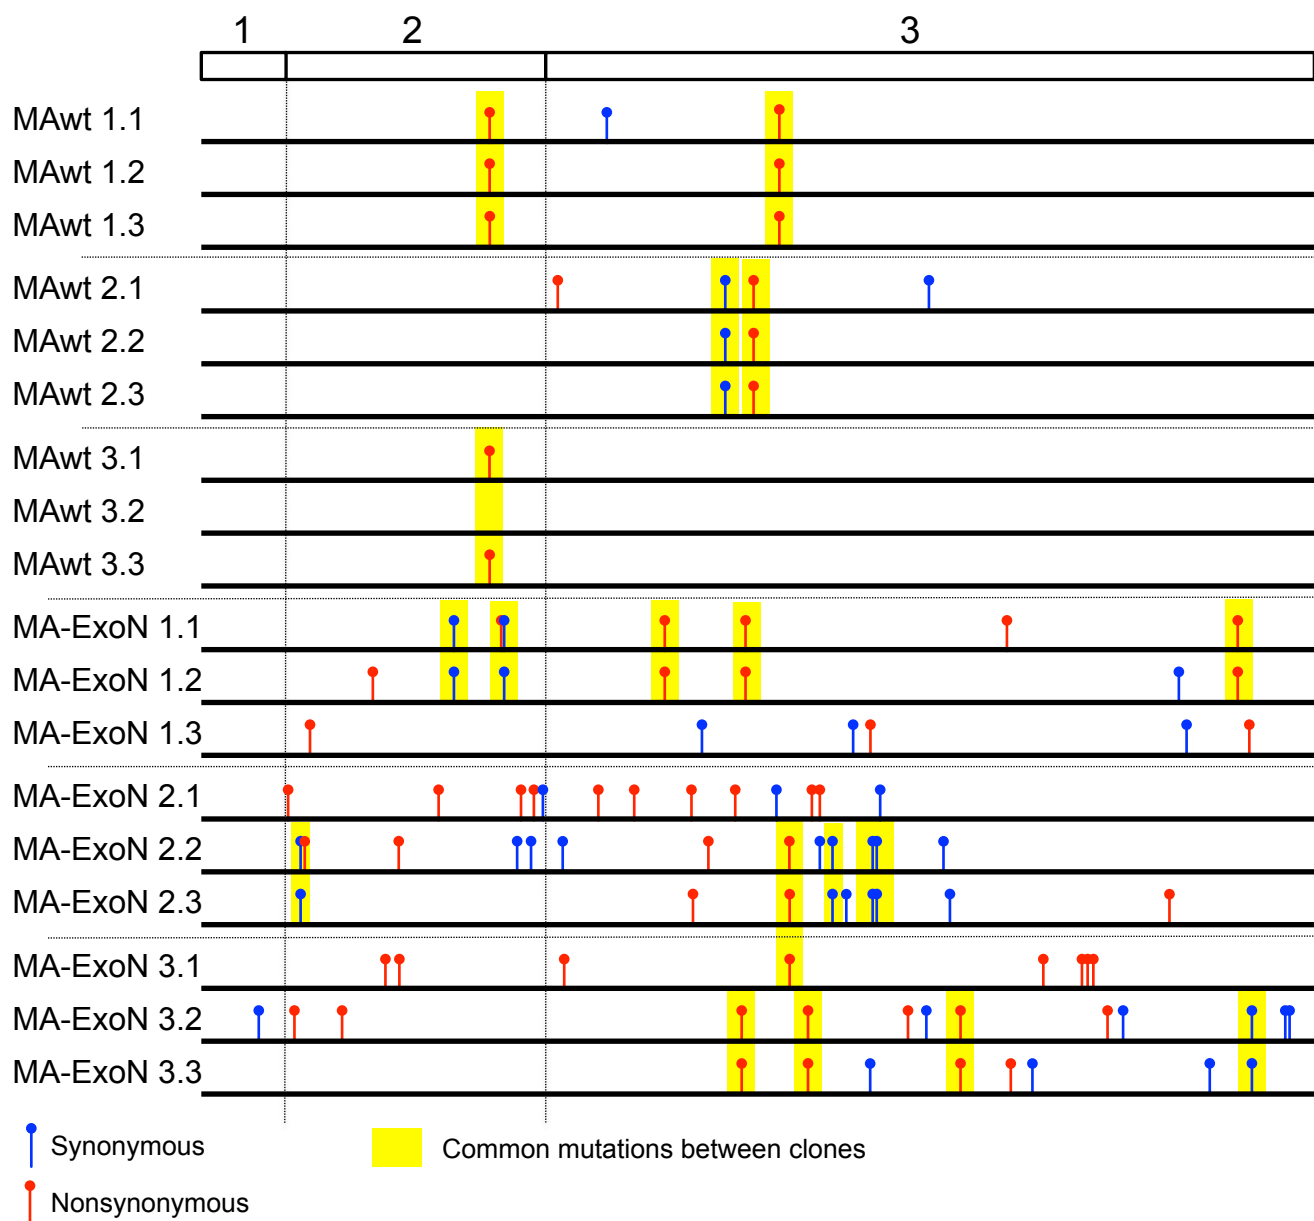

**Supplementary Figure 2. Mutation accumulation in ORF1a in infected SCID mice at 30 d p.i.** Multiple plaque isolates from each mouse lung (see Fig. 4) were sequenced from nts 493–8603. Individual SCID mouse genome sequences are represented by black horizontal lines. Dashed lines separate the nsp sequences in ORF1a. Mutations are indicated by lollipop shapes. Colors are as follows: blue: synonymous; red: nonsynonymous. Common mutations identified between clones are shaded in yellow.

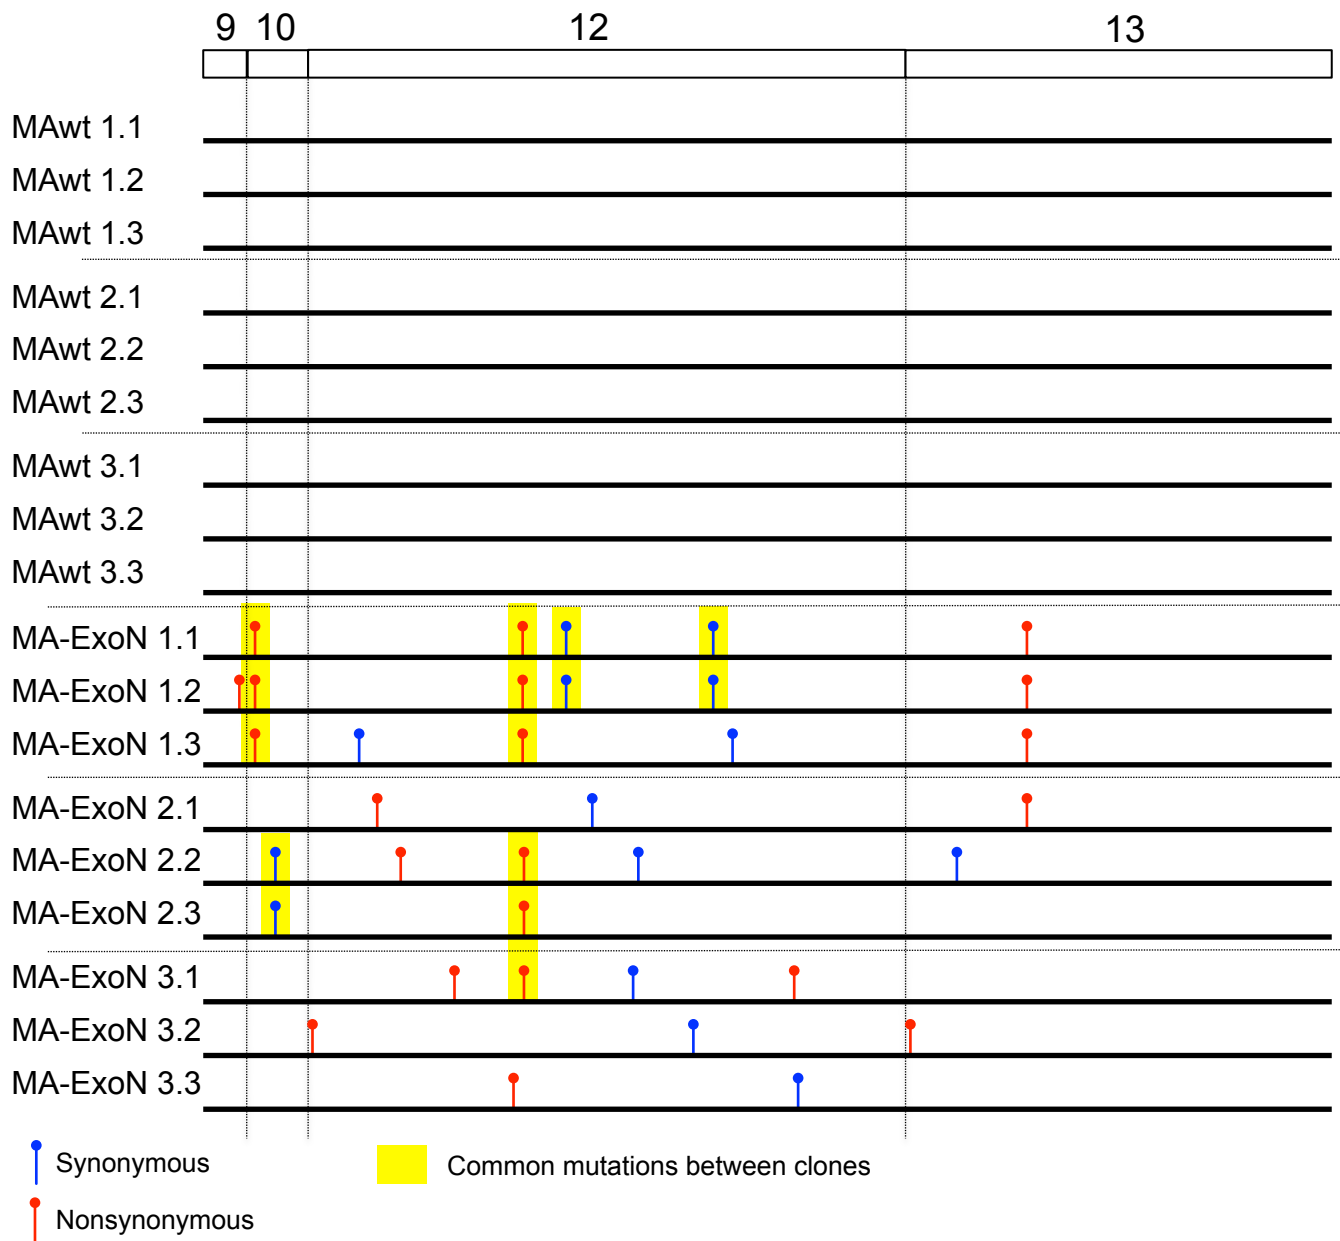

**Supplementary Figure 3. Mutation accumulation in ORF1b in infected SCID mice at 30 d p.i.** Multiple plaque isolates from each mouse lung (see Fig. 4) were sequenced from nts 12,915–16,520. Individual SCID mouse genome sequences are represented by black horizontal lines. Dashed lines separate the nsp sequences in ORF1b. Mutations are indicated by lollipop shapes. Colors are as follows: blue: synonymous; red: nonsynonymous. Common mutations identified between clones are shaded in yellow.

**Supplementary Table 1. *In Vivo* Mann-Whitney *U* Test Results for Weight Loss Differences, Days 1–4 Post-Infection**

| <b>Mouse/Virus Combination</b> | <b>Day 1</b>     | <b>Day 2</b>                  | <b>Day 3</b>                  | <b>Day 4</b>                  |
|--------------------------------|------------------|-------------------------------|-------------------------------|-------------------------------|
| STAT ExoN/MAwt                 | 0.1774892        | <b>0.01731602</b>             | <b>0.004329</b>               | <b>0.004329</b>               |
| ExoN STAT/129                  | 0.930736         | 0.1255412                     | 0.536796                      | 0.662338                      |
| MAwt STAT/129                  | 0.082251         | 0.1774892                     | <b>0.008658</b>               | <b>0.004329</b>               |
| 129 ExoN/MAwt                  | 0.1255412        | 0.082251                      | <b>0.01731602</b>             | <b>0.030303</b>               |
| RAG ExoN/MAwt                  | <b>0.0079365</b> | 0.420634                      | <b>0.031746</b>               | 1                             |
| ExoN RAG/B6                    | <b>0.030303</b>  | 0.930736                      | 0.246754                      | 0.246754                      |
| MAwt RAG/B6                    | 0.082251         | 0.1774892                     | 1                             | 0.536796                      |
| B6 ExoN/MAwt                   | 0.588744         | <b>0.01515152</b>             | <b>0.0021645</b>              | 0.0930736                     |
| SCID ExoN/MAwt                 | 0.181018         | 0.986466                      | <b>0.000996702</b>            | <b>5.05 × 10<sup>-5</sup></b> |
| ExoN SCID/BALB                 | 0.581148         | <b>0.00262108</b>             | <b>1.04 × 10<sup>-5</sup></b> | 0.0755026                     |
| MAwt SCID/BALB                 | 0.068171         | <b>1.16 × 10<sup>-7</sup></b> | <b>4.08 × 10<sup>-6</sup></b> | <b>4.08 × 10<sup>-6</sup></b> |
| BALB ExoN/MAwt                 | 0.846998         | <b>8.51 × 10<sup>-5</sup></b> | <b>1.55 × 10<sup>-4</sup></b> | <b>1.55 × 10<sup>-4</sup></b> |

Significant values ( $P < 0.05$ ) are displayed in bold font.

**Supplementary Table 2. SCID 30-Day Mutations: Whole-Genome, ORF1a, and ORF1b**

| SCID Clone          | Genome Position | Nucleotide Change | Region       | Synonymous (S) or Nonsynonymous (N) | AA Change | Present in Clones* |
|---------------------|-----------------|-------------------|--------------|-------------------------------------|-----------|--------------------|
| <b>Whole genome</b> |                 |                   |              |                                     |           |                    |
| MA-ExoN 1.1         | 1980            | T-C               | nsp2         | S                                   |           | 1.1, 1.2           |
|                     | 2300            | T-C               | nsp2         | N                                   | I499T     | 1.1                |
|                     | 2304            | T-C               | nsp2         | S                                   |           | 1.1, 1.2           |
|                     | 3634            | G-A               | nsp3         | N                                   | A306T     | 1.1, 1.2           |
|                     | 4127            | T-C               | nsp3         | N                                   | M470T     | 1.1, 1.2           |
|                     | 6211            | A-G               | nsp3         | N                                   | N1165D    | 1.1                |
|                     | 7951            | G-A               | nsp3         | N                                   | V1745I    | 1.1, 1.2           |
|                     | 11231           | T-C               | nsp6         | N                                   | L110P     |                    |
|                     | 11405           | T-C               | nsp6         | N                                   | V168A     |                    |
|                     | 13042           | T-C               | nsp10        | N                                   | Y30H      | 1.1, 1.2, 1.3      |
|                     | 14469           | A-T               | nsp12        | N                                   | S367C     | 1.1, 1.2, 1.3      |
|                     | 14738           | T-C               | nsp12        | S                                   |           | 1.1, 1.2           |
|                     | 15308           | T-C               | nsp12        | S                                   |           | 1.1, 1.2           |
|                     | 16999           | C-A               | nsp13        | N                                   | S278Y     | 1.1, 1.2, 1.3, 2.1 |
|                     | 18238-18239     | AT-CC             | nsp14        | N (ExoN inactivation)               | D90A      |                    |
|                     | 18244-18245     | AG-CC             | nsp14        | N (ExoN inactivation)               | E92A      |                    |
|                     | 18734           | T-C               | nsp14        | S                                   |           |                    |
|                     | 20431           | T-C               | nsp15        | N                                   | V294A     |                    |
|                     | 23053           | A-C               | Spike        | N                                   | K521T     |                    |
|                     | 23638           | C-T               | Spike        | N                                   | T716I     |                    |
|                     | 23678           | T-C               | Spike        | S                                   |           |                    |
|                     | 27304-27323     | deletion          | ORF7a        | Truncates to 17 aa                  |           |                    |
|                     | 27334           | A-G               | ORF7a        | Part of truncated portion           |           |                    |
|                     | 27724           | G-A               | ORF7b        | Creates stop after 28 aa            |           |                    |
|                     | 28584           | T-C               | Nucleocapsid | S                                   |           |                    |
|                     | 28949           | G-A               | Nucleocapsid | N                                   | R277K     |                    |
|                     | MA-ExoN 2.1     | 321               | T-C          | nsp1                                | S         |                    |
| 465                 |                 | C-T               | nsp1         | S                                   |           |                    |
| 809                 |                 | T-C               | nsp2         | N                                   | V2A       | 2.1                |
| 1924                |                 | G-C               | nsp2         | N                                   | A374P     | 2.1                |
| 2506                |                 | G-A               | nsp2         | N                                   | D568N     | 2.1                |
| 2599                |                 | G-A               | nsp2         | N                                   | V599I     | 2.1                |
| 2673                |                 | T-C               | nsp2         | S                                   |           | 2.1                |
| 3054                |                 | G-T               | nsp3         | N                                   | E112D     | 2.1                |
| 3235                |                 | A-G               | nsp3         | N                                   | I173V     | 2.1                |
| 3704                |                 | T-C               | nsp3         | N                                   | V329A     | 2.1                |
| 4076                |                 | T-C               | nsp3         | N                                   | D453V     | 2.1                |
| 4314                |                 | T-C               | nsp3         | S                                   |           | 2.1                |
| 4542                |                 | T-G (het)         | nsp3         | N                                   | I608M     | 2.1                |
| 4610                |                 | C-T               | nsp3         | N                                   | A631V     | 2.1                |
| 5094                |                 | G-A               | nsp3         | S                                   |           | 2.1                |
| 9499                |                 | C-T               | nsp4         | N                                   | P339S     |                    |
| 11405               |                 | T-C               | nsp6         | N                                   | V168A     |                    |
| 11550               |                 | C-T               | nsp6         | S                                   |           |                    |
| 13621               |                 | A-G               | nsp12        | N                                   | E84G      | 2.1                |
| 14842               |                 | A-G               | nsp12        | N                                   | N491S     | 2.1                |
| 16999               |                 | C-A               | nsp13        | N                                   | S278Y     | 1.1, 1.2, 1.3, 2.1 |
| 17185               |                 | T-C               | nsp13        | N                                   | V340A     |                    |
| 17693               |                 | T-C               | nsp13        | S                                   |           |                    |

Supplementary Table 2, page 2

|             |             |           |              |                       |        |                         |
|-------------|-------------|-----------|--------------|-----------------------|--------|-------------------------|
|             | 18083       | A-G       | nsp14        | S                     |        |                         |
|             | 18238-18239 | AT-CC     | nsp14        | N (ExoN inactivation) | D90A   |                         |
|             | 18244-18245 | AG-CC     | nsp14        | N (ExoN inactivation) | E92A   |                         |
|             | 19755       | A-G       | nsp15        | N                     | I69V   |                         |
|             | 21579       | T-C       | Spike        | N                     | Y30H   |                         |
|             | 22778       | T-C (het) | Spike RBD    | S                     |        |                         |
|             | 22793       | T-G (het) | Spike RBD    | S                     |        |                         |
|             | 23321       | T-C       | Spike        | S                     |        |                         |
|             | 25983       | A-G       | ORF3a        | N                     | D239G  |                         |
|             | 27519       | T-C       | ORF7a        | N                     | S83P   |                         |
|             | 28696       | G-A       | Nucleocapsid | N                     | G193S  |                         |
| MA-ExoN 3.1 | 98          | G-A       | 5' UTR       | n/a                   |        |                         |
|             | 1516        | A-G       | nsp2         | N                     | N238D  | 3.1                     |
|             | 1711        | T-C       | nsp2         | N                     | S303P  | 3.1                     |
|             | 2848        | A-T       | nsp3         | N                     | T44S   | 3.1                     |
|             | 4444        | T-C       | nsp3         | N                     | Y576H  | 2.2, 2.3, 3.1           |
|             | 6559        | A-G       | nsp3         | N                     | I1281V | 3.1                     |
|             | 6803        | T-C       | nsp3         | N                     | V1362A | 3.1                     |
|             | 6887        | T-C       | nsp3         | N                     | M1390T | 3.1                     |
|             | 6971        | C-T       | nsp3         | N                     | A1419V | 3.1                     |
|             | 8640        | T-A       | nsp4         | S                     |        |                         |
|             | 9800        | C-T       | nsp4         | N                     | T439I  |                         |
|             | 10154       | T-G       | nsp5         | N                     | L57R   |                         |
|             | 10437       | C-T       | nsp5         | S                     |        |                         |
|             | 10548       | A-G       | nsp5         | S                     |        |                         |
|             | 12831       | T-C       | nsp9         | S                     |        |                         |
|             | 14046       | G-A       | nsp12        | N                     | A226T  | 3.1                     |
|             | 14471       | T-A       | nsp12        | N                     | S367R  | 2.2, 2.3, 3.1           |
|             | 14891       | T-C       | nsp12        | S                     |        | 3.1                     |
|             | 15685       | C-T       | nsp12        | N                     | A772V  | 3.1                     |
|             | 16710       | T-C       | nsp13        | N                     | F182L  |                         |
|             | 18238-18239 | AT-CC     | nsp14        | N (ExoN inactivation) | D90A   |                         |
|             | 18244-18245 | AG-CC     | nsp14        | N (ExoN inactivation) | E92A   |                         |
|             | 18533       | T-C       | nsp14        | S                     |        |                         |
|             | 19881       | C-T       | nsp15        | N                     | P111S  |                         |
|             | 20918       | T-A       | nsp16        | S                     |        |                         |
|             | 21620       | T-A       | Spike        | S                     |        |                         |
|             | 21925       | G-A       | Spike        | N                     | G145D  |                         |
|             | 22569       | T-C       | Spike RBD    | N                     | F360L  |                         |
|             | 22913       | T-C       | Spike RBD    | S                     |        |                         |
|             | 26341       | G-T       | Envelope     | S                     |        |                         |
|             | 26648       | C-T       | Membrane     | N                     | A84V   |                         |
|             | 27084       | T-C       | ORF6         | N                     | L4P    |                         |
|             | 27107       | G-A       | ORF6         | N                     | A12T   |                         |
|             | 27355       | C-T       | ORF7a        | N                     | T28I   |                         |
|             | 27453       | A-G       | ORF7a        | N                     | T61A   |                         |
|             | 28097       | T-C       | ORF8b        | S                     |        |                         |
|             | 28266       | T-C       | Nucleocapsid | S                     |        |                         |
| MAwt 1.1    | 2274        | C-A       | nsp2         | N                     | N490K  | 1.1, 1.2, 1.3, 3.1, 3.3 |
|             | 3138        | A-G (het) | nsp3         | S                     |        | 1.1                     |
|             | 4394        | C-T       | nsp3         | N                     | T559I  | 1.1, 1.2, 1.3           |
|             | 9690        | C-A       | nsp4         | S                     |        |                         |
|             | 18718       | C-T       | nsp14        | N                     | T250M  |                         |

Supplementary Table 2, page 3

|                             |       |           |       |   |        |                            |
|-----------------------------|-------|-----------|-------|---|--------|----------------------------|
|                             | 20528 | A-G       | nsp15 | S |        |                            |
| MAwt 2.1                    | 2819  | A-G       | nsp3  | N | K34R   | 2.1                        |
|                             | 3921  | G-A       | nsp3  | S |        | 2.1, 2.2, 2.3              |
|                             | 4192  | T-A       | nsp3  | N | C492S  | 2.1, 2.2, 2.3              |
|                             | 5584  | C-T       | nsp3  | S |        | 2.1                        |
|                             | 9866  | C-T       | nsp4  | N | T461I  |                            |
|                             | 20528 | A-G       | nsp15 | S |        |                            |
| MAwt 3.1                    | 2274  | C-A       | nsp2  | N | N490K  | 1.1, 1.2,<br>1.3, 3.1, 3.3 |
|                             | 20528 | A-G       | nsp15 | S |        |                            |
| <b>ORF1a (nts 493–8603)</b> |       |           |       |   |        |                            |
| MA-ExoN 1.1                 | 1980  | T-C       | nsp2  | S |        | 1.1, 1.2                   |
|                             | 2300  | T-C       | nsp2  | N | I499T  | 1.1                        |
|                             | 2304  | T-C       | nsp2  | S |        | 1.1, 1.2                   |
|                             | 3634  | G-A       | nsp3  | N | A306T  | 1.1, 1.2                   |
|                             | 4127  | T-C       | nsp3  | N | M470T  | 1.1, 1.2                   |
|                             | 6211  | A-G       | nsp3  | N | N1165D | 1.1                        |
|                             | 7951  | G-A       | nsp3  | N | V1745I | 1.1, 1.2                   |
| MA-ExoN 1.2                 | 1402  | C-T       | nsp2  | N | P200S  | 1.2                        |
|                             | 1980  | T-C       | nsp2  | S |        | 1.1, 1.2                   |
|                             | 2304  | T-C       | nsp2  | S |        | 1.1, 1.2                   |
|                             | 3634  | G-A       | nsp3  | N | M470T  | 1.1, 1.2                   |
|                             | 4127  | T-C       | nsp3  | N | A306T  | 1.1, 1.2                   |
|                             | 7404  | T-A       | nsp3  | S |        | 1.2                        |
|                             | 7951  | G-A       | nsp3  | N | V1745I | 1.1, 1.2                   |
| MA-ExoN 1.3                 | 872   | A-G       | nsp2  | N | D23G   | 1.3                        |
|                             | 3759  | C-T       | nsp3  | S |        | 1.3                        |
|                             | 4896  | T-C       | nsp3  | S |        | 1.3                        |
|                             | 5006  | T-C       | nsp3  | N | V763A  | 1.3                        |
|                             | 7452  | A-G       | nsp3  | S |        | 1.3                        |
|                             | 8114  | G-A       | nsp3  | N | G1799D | 1.3                        |
| MA-ExoN 2.1                 | 809   | T-C       | nsp2  | N | V2A    | 2.1                        |
|                             | 1924  | G-C       | nsp2  | N | A374P  | 2.1                        |
|                             | 2506  | G-A       | nsp2  | N | D568N  | 2.1                        |
|                             | 2599  | G-A       | nsp2  | N | V599I  | 2.1                        |
|                             | 2673  | T-C       | nsp2  | S |        | 2.1                        |
|                             | 3054  | G-T       | nsp3  | N | E112D  | 2.1                        |
|                             | 3235  | A-G       | nsp3  | N | I173V  | 2.1                        |
|                             | 3704  | T-C       | nsp3  | N | V329A  | 2.1                        |
|                             | 4076  | T-C       | nsp3  | N | D453V  | 2.1                        |
|                             | 4314  | T-C       | nsp3  | S |        | 2.1                        |
|                             | 4542  | T-G (het) | nsp3  | N | I608M  | 2.1                        |
|                             | 4610  | C-T       | nsp3  | N | A631V  | 2.1                        |
|                             | 5094  | G-A       | nsp3  | S |        | 2.1                        |
| MA-ExoN 2.2                 | 855   | T-C       | nsp2  | S |        | 2.2, 2.3                   |
|                             | 865   | A-G (het) | nsp2  | N | I21V   | 2.2                        |
|                             | 1699  | T-C (het) | nsp2  | N | S299P  | 2.2                        |
|                             | 2487  | T-C (het) | nsp2  | S |        | 2.2                        |
|                             | 2595  | T-C (het) | nsp2  | S |        | 2.2                        |
|                             | 2841  | T-C (het) | nsp3  | S |        | 2.2                        |
|                             | 3857  | T-C (het) | nsp3  | N | V380A  | 2.2                        |
|                             | 4444  | T-C       | nsp3  | N | Y576H  | 2.2, 2.3, 3.1              |
|                             | 4614  | A-G (het) | nsp3  | S |        | 2.2                        |
|                             | 4704  | A-het     | nsp3  | S |        | 2.2, 2.3                   |

Supplementary Table 2, page 4

|             |      |           |      |   |        |                            |
|-------------|------|-----------|------|---|--------|----------------------------|
|             | 5034 | T-C       | nsp3 | S |        | 2.2, 2.3                   |
|             | 5067 | T-C       | nsp3 | S |        | 2.2, 2.3                   |
|             | 5631 | T-C (het) | nsp3 | S |        | 2.2                        |
| MA-ExoN 2.3 | 855  | T-C       | nsp2 | S |        | 2.2, 2.3                   |
|             | 3731 | A-G       | nsp3 | N | N338S  | 2.3                        |
|             | 4444 | T-C       | nsp3 | N | Y576H  | 2.2, 2.3, 3.1              |
|             | 4704 | A-G       | nsp3 | S |        | 2.2, 2.3                   |
|             | 4839 | T-A       | nsp3 | S |        | 2.3                        |
|             | 5034 | T-C       | nsp3 | S |        | 2.2, 2.3                   |
|             | 5067 | T-C       | nsp3 | S |        | 2.2, 2.3                   |
|             | 5697 | T-C       | nsp3 | S |        | 2.3                        |
|             | 7379 | A-T       | nsp3 | S |        | 2.3                        |
| MA-ExoN 3.1 | 1516 | A-G       | nsp2 | N | N238D  | 3.1                        |
|             | 1711 | T-C       | nsp2 | N | S303P  | 3.1                        |
|             | 2848 | A-T       | nsp3 | N | T44S   | 3.1                        |
|             | 4444 | T-C       | nsp3 | N | Y576H  | 2.2, 2.3, 3.1              |
|             | 6559 | A-G       | nsp3 | N | I1281V | 3.1                        |
|             | 6803 | T-C       | nsp3 | N | V1362A | 3.1                        |
|             | 6887 | T-C       | nsp3 | N | M1390T | 3.1                        |
|             | 6971 | C-T       | nsp3 | N | A1419V | 3.1                        |
| MA-ExoN 3.2 | 648  | T-C (het) | nsp1 | S |        | 3.2                        |
|             | 832  | T-C (het) | nsp2 | N | F10L   | 3.2                        |
|             | 1108 | A-G (het) | nsp2 | N | K102E  | 3.2                        |
|             | 4106 | A-C       | nsp3 | N | K463T  | 3.2, 3.3                   |
|             | 4536 | G-A       | nsp3 | N | M606I  | 3.2, 3.3                   |
|             | 5353 | A-G (het) | nsp3 | N | K879E  | 3.2                        |
|             | 5550 | T-C (het) | nsp3 | S |        | 3.2                        |
|             | 5818 | A-G (het) | nsp3 | N | T1034A | 3.2, 3.3                   |
|             | 7001 | T-C (het) | nsp3 | N | L1428S | 3.2                        |
|             | 7101 | A-T       | nsp3 | S |        | 3.2                        |
|             | 8166 | T-A       | nsp3 | S |        | 3.2, 3.3                   |
|             | 8343 | A-G (het) | nsp3 | S |        | 3.2                        |
|             | 8361 | T-C (het) | nsp3 | S |        | 3.2                        |
| MA-ExoN 3.3 | 4106 | A-C       | nsp3 | N | K463T  | 3.2, 3.3                   |
|             | 4536 | G-A       | nsp3 | N | M606I  | 3.2, 3.3                   |
|             | 5025 | T-C (het) | nsp3 | S |        | 3.3                        |
|             | 5818 | A-G (het) | nsp3 | N | T1034A | 3.2, 3.3                   |
|             | 6254 | A-G       | nsp3 | N | D1179G | 3.3                        |
|             | 6462 | G-A       | nsp3 | S |        | 3.3                        |
|             | 7602 | T-C       | nsp3 | S |        | 3.3                        |
|             | 8166 | T-A       | nsp3 | S |        | 3.2, 3.3                   |
| MAwt 1.1    | 2274 | C-A       | nsp2 | N | N490K  | 1.1, 1.2,<br>1.3, 3.1, 3.3 |
|             | 3138 | A-G (het) | nsp3 | S |        | 1.1                        |
|             | 4394 | C-T       | nsp3 | N | T559I  | 1.1, 1.2, 1.3              |
| MAwt 1.2    | 2274 | C-A       | nsp2 | N | N490K  | 1.1, 1.2,<br>1.3, 3.1, 3.3 |
|             | 4394 | C-T       | nsp3 | N | T559I  | 1.1, 1.2, 1.3              |
| MAwt 1.3    | 2274 | C-A       | nsp2 | N | N490K  | 1.1, 1.2,<br>1.3, 3.1, 3.3 |
|             | 4394 | C-T       | nsp3 | N | T559I  | 1.1, 1.2, 1.3              |
| MAwt 2.1    | 2819 | A-G       | nsp3 | N | K34R   | 2.1                        |
|             | 3921 | G-A       | nsp3 | S |        | 2.1, 2.2, 2.3              |
|             | 4192 | T-A       | nsp3 | N | C492S  | 2.1, 2.2, 2.3              |



|                                                                    |       |           |       |   |       |                            |
|--------------------------------------------------------------------|-------|-----------|-------|---|-------|----------------------------|
|                                                                    | 5584  | C-T       | nsp3  | S |       | 2.1                        |
| MAwt 2.2                                                           | 3921  | G-A       | nsp3  | S |       | 2.1, 2.2, 2.3              |
|                                                                    | 4192  | T-A       | nsp3  | N | C492S | 2.1, 2.2, 2.3              |
| MAwt 2.3                                                           | 3921  | G-A       | nsp3  | S |       | 2.1, 2.2, 2.3              |
|                                                                    | 4192  | T-A       | nsp3  | N | C492S | 2.1, 2.2, 2.3              |
| MAwt 3.1                                                           | 2274  | C-A       | nsp2  | N | N490K | 1.1, 1.2,<br>1.3, 3.1, 3.3 |
| MAwt 3.2                                                           | None  |           |       |   |       |                            |
| MAwt 3.3                                                           | 2274  | C-A       | nsp2  | N | N490K | 1.1, 1.2,<br>1.3, 3.1, 3.3 |
| <b>ORF1b (nts 12,915–16,520; nt 16999 was verified separately)</b> |       |           |       |   |       |                            |
| MA-ExoN 1.1                                                        | 13042 | T-C       | nsp10 | N | Y30H  | 1.1, 1.2, 1.3              |
|                                                                    | 14469 | A-T       | nsp12 | N | S367C | 1.1, 1.2, 1.3              |
|                                                                    | 14738 | T-C       | nsp12 | S |       | 1.1, 1.2                   |
|                                                                    | 15308 | T-C       | nsp12 | S |       | 1.1, 1.2                   |
|                                                                    | 16999 | C-A       | nsp13 | N | S278Y | 1.1, 1.2,<br>1.3, 2.1      |
| MA-ExoN 1.2                                                        | 12935 | C-T (het) | nsp9  | N | A107V | 1.2                        |
|                                                                    | 13042 | T-C       | nsp10 | N | Y30H  | 1.1, 1.2, 1.3              |
|                                                                    | 14469 | A-T       | nsp12 | N | S367C | 1.1, 1.2, 1.3              |
|                                                                    | 14738 | T-C       | nsp12 | S |       | 1.1, 1.2                   |
|                                                                    | 15308 | T-C       | nsp12 | S |       | 1.1, 1.2                   |
|                                                                    | 16999 | C-A       | nsp13 | N | S278Y | 1.1, 1.2,<br>1.3, 2.1      |
| MA-ExoN 1.3                                                        | 13042 | T-C       | nsp10 | N | Y30H  | 1.1, 1.2, 1.3              |
|                                                                    | 13541 | G-A       | nsp12 | S |       | 1.3                        |
|                                                                    | 14469 | A-T       | nsp12 | N | S367C | 1.1, 1.2, 1.3              |
|                                                                    | 15428 | A-G       | nsp12 | S |       | 1.3                        |
|                                                                    | 16999 | C-A       | nsp13 | N | S278Y | 1.1, 1.2,<br>1.3, 2.1      |
| MA-ExoN 2.1                                                        | 13621 | A-G       | nsp12 | N | E84G  | 2.1                        |
|                                                                    | 14842 | A-G       | nsp12 | N | N491S | 2.1                        |
|                                                                    | 16999 | C-A       | nsp13 | N | S278Y | 1.1, 1.2,<br>1.3, 2.1      |
| MA-ExoN 2.2                                                        | 13104 | T-C       | nsp10 | S |       | 2.2, 2.3                   |
|                                                                    | 13798 | A-G (het) | nsp12 | N | K143R | 2.2                        |
|                                                                    | 14471 | T-A       | nsp12 | N | S367R | 2.2, 2.3, 3.1              |
|                                                                    | 14915 | T-C (het) | nsp12 | S |       | 2.2                        |
|                                                                    | 16334 | T-C (het) | nsp13 | S |       | 2.2                        |
| MA-ExoN 2.3                                                        | 13104 | T-C       | nsp10 | S |       | 2.2, 2.3                   |
|                                                                    | 14471 | T-A       | nsp12 | N | S367R | 2.2, 2.3, 3.1              |
| MA-ExoN 3.1                                                        | 14046 | G-A       | nsp12 | N | A226T | 3.1                        |
|                                                                    | 14471 | T-A       | nsp12 | N | S367R | 2.2, 2.3, 3.1              |
|                                                                    | 14891 | T-C       | nsp12 | S |       | 3.1                        |
|                                                                    | 15685 | C-T       | nsp12 | N | A772V | 3.1                        |
| MA-ExoN 3.2                                                        | 13380 | T-A (het) | nsp12 | N | D3E   | 3.2                        |
|                                                                    | 15236 | T-C (het) | nsp12 | S |       | 3.2                        |
|                                                                    | 16177 | T-C       | nsp13 | N | V4A   | 3.2                        |
| MA-ExoN 3.3                                                        | 14452 | T-C       | nsp12 | N | L361S | 3.3                        |
|                                                                    | 15698 | A-T       | nsp12 | S |       | 3.3                        |
| MAwt 1.1                                                           | None  |           |       |   |       |                            |

|          |      |  |  |  |  |  |
|----------|------|--|--|--|--|--|
| MAwt 1.2 | None |  |  |  |  |  |
| MAwt 1.3 | None |  |  |  |  |  |
| MAwt 2.1 | None |  |  |  |  |  |
| MAwt 2.2 | None |  |  |  |  |  |
| MAwt 2.3 | None |  |  |  |  |  |
| MAwt 3.1 | None |  |  |  |  |  |
| MAwt 3.2 | None |  |  |  |  |  |
| MAwt 3.3 | None |  |  |  |  |  |

\*Data entered in "Present in Clones" column only if more than one plaque isolate per mouse was sequenced at that nucleotide position.

**Supplementary Table 3. SNP Results from Short-Term BALB/c Infections**

| Virus   | SNP      | Region | AA Change | Young BALB/c | Old BALB/c | SCID Clones |
|---------|----------|--------|-----------|--------------|------------|-------------|
| MA-ExoN | C1142Y   | nsp2   | T113I     | 1/10         | 0/10       |             |
|         | A3053R   | nsp3   | E112G     | 0/10         | 1/10       |             |
|         | T11405Y  | nsp6   | V168A     | 0/10         | 1/10       | 2/9         |
|         | C16999M* | nsp13  | S278Y     | 10/10        | 10/10      | 4/9         |
|         | G22822R  | Spike  | R444K     | 1/10         | 2/10       |             |
|         | C23638Y  | Spike  | T716I     | 2/10         | 6/10       | 1/9         |
| MAwt    | T4192A   | nsp3   | C492S     | 10/10        | 10/10      | 3/9         |
|         | T11006C  | nsp6   | F35S      | 10/10        | 10/10      | 2/9         |
|         | C29536Y  | 3'UTR  | n/a       | 1/10         | 0/10       |             |

\*Upon Sanger sequencing of this allele, mutation frequency was consistently maintained at approximately 40% both *in vitro* and *in vivo*.

**Supplementary Table 4. PCR and Sequencing Primers and Amplicon Sets**

| <b>Primer</b>       | <b>Nt position</b> | <b>Sequence*</b>        |
|---------------------|--------------------|-------------------------|
| SURB1F <sup>1</sup> | 1–24               | ATATTAGTTTTTACCTACCCAGG |
| S1F <sup>A</sup>    | 493–513            | TTAAGCACCAATCACGGCCAC   |
| S2aF                | 1056–1075          | CACTTTCAAAGGGGAATGCC    |
| S3F                 | 1577–1596          | TTACTGGTGACAATGTGGAG    |
| S4F <sup>2,B</sup>  | 2149–2171          | GAATGGATTGAGGCGAACTTAG  |
| S5F                 | 2743–2764          | GGAGAAGATACTGTTTGGGAAG  |
| S6F                 | 3324–3344          | TGTTGACATCGTTAAGGAGGC   |
| S7F <sup>C</sup>    | 3861–3880          | GAAGCCTGTCGATGTGAAGC    |
| S8F <sup>3</sup>    | 4431–4450          | GGGCATCGTTGACTATGGTG    |
| S9F                 | 4989–5009          | CTTGGATGGTGCTGATGTTAC   |
| S10aF <sup>D</sup>  | 5608–5627          | GTTATGATGTCTGCACCACC    |
| S11aF               | 6166–6185          | GTTTGGCACATTAACCAGGC    |
| S12F <sup>4,E</sup> | 6662–6682          | GCGCTAAGAGATTAGCACAAAC  |
| S13F                | 7219–7240          | GGTCTTTCAGCTATAATGCAGG  |
| S14F                | 7824–7843          | TGATGGCAAGTCCAAATGCC    |
| S15F                | 8381–8400          | TTCGTAGTGCTGCCAAGAAG    |
| S16F <sup>5</sup>   | 8935–8954          | GTTCTTGCTGCTGAGTGAC     |
| S17aF               | 9552–9571          | TGTTTCATTCTTGGCTCACC    |
| S18F                | 10084–10103        | GACACAGTATACTGTCCAAG    |
| S19F <sup>X</sup>   | 10611–10630        | TGCTGCTGTTATCAATGGTG    |
| S20F <sup>6</sup>   | 11168–11187        | GCTGGGTGATGCGTATCATG    |
| S21F                | 11721–11741        | TAAGTTGTTGGGTATTGGAGG   |
| S22aF               | 12389–12408        | CTACAGCAGCCAAACTCATG    |
| S23F <sup>F</sup>   | 12915–12934        | TATGGTGCTGGGCAGTTTAG    |
| S24F <sup>7</sup>   | 13450–13469        | GTACTGATGTCGTCTACAGG    |
| S25F                | 14021–14040        | CGATTTCCGGTGATTTCTGAC   |
| S26F                | 14548–14569        | CTACATGCTTTTCAGTAGCTGC  |
| S27F <sup>G</sup>   | 15101–15120        | GTCAATAGCCGCCACTAGAG    |
| S28F <sup>8</sup>   | 15646–15665        | CTGATGATGCCGTTGTGTGC    |
| S29aF <sup>Y</sup>  | 16243–16262        | GTTGCAAGTGCTGCTATGAC    |
| S30F                | 16775–16794        | TGACTATGGTGATGCTGTTG    |
| S31aF               | 17399–17418        | GCTGACTAAAGGCACACTAG    |
| S32F <sup>9</sup>   | 17931–17951        | AGTCTAGAAATACCACGTCGC   |
| S33aF               | 18569–18588        | GATTGGACCTGAAAGAACGT    |
| S34F                | 19132–19151        | ACGTTGATCGTTACCCAGCC    |
| S35F                | 19706–19726        | TGTTGCATTTGAGCTTTGGGC   |
| S36F <sup>10</sup>  | 20261–20280        | TGGAGATTTCAATCATGGAC    |
| S37F                | 20801–20820        | TGCTGGCTCTGATAAAGGAG    |
| S38aF               | 21420–21439        | GGTAGGCTTATCATTAGAGA    |
| S39F                | 21924–21944        | GGTACACAGACACATACTATG   |
| S40F <sup>11</sup>  | 22491–22510        | TTCCCTTCTGTCTATGCATG    |
| S41F                | 23081–23100        | TGGACTCACTGGTACTGGTG    |
| S42aF               | 23724–23743        | CTAAATCGTGCCTCTCAGG     |
| S43F                | 24263–24282        | AACTGCATTGGGCAAGCTGC    |
| S44F <sup>12</sup>  | 24851–24870        | TGATCCTCTGCAACCTGAGC    |
| S45F                | 25411–25430        | TGGCGTTGCATTTCTTGCTG    |
| S46F                | 25978–25997        | TAAAGACCCACCGAATGTGC    |
| S47F                | 26590–26609        | GTGCTTGCTGCTGTCTACAG    |
| S48F <sup>13</sup>  | 27132–27153        | GGACTTTCAGGATTGCTATTTG  |
| S49F                | 27729–27749        | CACTCGAAATCCAGGATCTAG   |
| S50F                | 28273–28292        | TCTTGTTACAGCTCTCAC      |
| S51F                | 28840–28860        | CAACAACAAGGCCAAACTGTC   |
| S52F                | 29410–29429        | GGCAGATGGGCTATGTAAAC    |
| S1R                 | 411–430            | GCTCTACTAGACCACAAGTG    |
| S2R                 | 911–931            | CGATGTAATCAAGTTGTTCCGG  |
| S3R                 | 1318–1337          | CCACATGTAGTAGGTCCTTC    |

|                     |             |                        |
|---------------------|-------------|------------------------|
| S4R                 | 1877–1896   | GATAACACCAGCAGCCTGTG   |
| S5R <sup>1,A</sup>  | 2421–2440   | GCTCCTTGCCACGTATACAC   |
| S6R                 | 3063–3082   | CCTCACACTCTGCATCGTCC   |
| S7R                 | 3619–3638   | GGTGCAAGTAAGATGTCCTG   |
| S8R                 | 4111–4131   | GAGCATCTCAGTAGTGCCACC  |
| S9R <sup>2,B</sup>  | 4654–4673   | GATGACGAAGTGAGGTATCC   |
| S10R                | 5301–5322   | GTTAGCAGCATCACCAGCACGG |
| S11R <sup>C</sup>   | 5819–5838   | CGACACAGGCTTGATGGTTG   |
| S12R                | 6401–6420   | GACATTGCCTACAACCTTCGG  |
| S13R <sup>3,D</sup> | 6983–7002   | CAATTCTCTAACGCCATTAC   |
| S14R                | 7514–7533   | CTTGCGAAGCCACGGCCTC    |
| S15aR               | 8061–8080   | CACCATCTAAAGCTACACCC   |
| S16aR <sup>E</sup>  | 8584–8603   | GTGTAACCATCATGGATTGA   |
| S17aR <sup>4</sup>  | 9144–9163   | CGCATGTACCATGTCTACAG   |
| S18R                | 9781–9800   | GTAAGTGGCAACAGTGTCTC   |
| S19aR               | 10265–10284 | CTTGGGTGTCTTAGGGTTAG   |
| S20R                | 10884–10903 | CTTGAAGGTAACACCAGAG    |
| S21R <sup>5,X</sup> | 11512–11532 | GATACACTGTAAGGTGTTGCC  |
| S22R                | 12076–12095 | GCCTGCTCATAGGCCCTCCTG  |
| S23R                | 12654–12673 | GTGTGGTACCAGCCGCACAG   |
| S24R                | 13184–13204 | GATGGTCAATGTGGCATCTAC  |
| S25R <sup>6</sup>   | 13704–13723 | CGCTGACGTGATATATGTGG   |
| S26R                | 14276–14295 | GAAGGATACACCTATCATCC   |
| S27R                | 14811–14830 | CAGCCACCATCGTAACAATC   |
| S28aR <sup>F</sup>  | 15326–15345 | ACTCGTTAGCTAACCTGTAG   |
| S29R <sup>7</sup>   | 15947–15966 | CATCAATAGCCAGTGACACG   |
| S30R <sup>G</sup>   | 16501–16520 | GCCAGCATTAGTCCAATCAC   |
| S31R                | 17068–17087 | CGTATACACTATGCGAGCAG   |
| S32R <sup>Y</sup>   | 17664–17683 | CAAGCAGGATTGCGTGTAA    |
| S33R <sup>8</sup>   | 18248–18268 | GCATCTCTAGTTGCATGACAG  |
| S34R                | 18833–18852 | CAACAGACCAATCAACGCGC   |
| S35R                | 19439–19458 | CATCCAAGTACTGTGGTAC    |
| S36aR               | 19862–19881 | GTTTCTTGGCAATGTCAGTC   |
| S37aR <sup>9</sup>  | 20420–20439 | GATCAATCACAGAACACACA   |
| S38R                | 21103–21123 | CAGCATTCCAAGAATGCTCTG  |
| S39R                | 21812–21833 | CACCGACTGTGACTTGTTGTTT |
| S40R                | 22341–22360 | ACAGAGCATTGAGTTCAGC    |
| S41aR <sup>10</sup> | 22765–22784 | AGTAGCATCAATGTTCTAG    |
| S42aR               | 23343–23362 | GTAGAATATATGCGCCAAGC   |
| S43R                | 23912–23931 | CAGCATCAGCGAGTGTCCACC  |
| S44aR               | 24432–24451 | TGAAGGCTTTGAAGTCTGCC   |
| S45R <sup>11</sup>  | 24987–25006 | GCGACCTCATTGAGGCGGTC   |
| S46R                | 25552–25571 | CCATACCTGCAGCGACAAGC   |
| S47aR               | 26054–26073 | GTCGTCGTCGGCTCATCATA   |
| S48R                | 26590–26609 | CTGTAGACAGCAGCAAGCAC   |
| S49R <sup>12</sup>  | 27285–27304 | ACAATCAATGTCAGGAAGAG   |
| S50aR               | 27739–27758 | AAGTTCTTCTAGATCCTGG    |
| S51aR               | 28330–28349 | GTGTTGATTGGAACGCCCTG   |
| S52aR               | 28869–28888 | TAGATGCCTCAGCAGCAGAT   |
| S53aR               | 29553–29572 | CTTTCAAGTCCTCCCTAATG   |
| S54aR <sup>13</sup> | 29682–29701 | TCACATGGGGATAGCACTAC   |

Amplicon-generating primers (1–13, A–G, X, Y) are indicated in superscript next to the relevant primers.

Amplicons were sequenced with all primers that fall between the amplicon-generating primers.

\*All sequences are listed 5'–3'.
